# Supplementary material for: Genetic Deletion of SEPT7 Reveals a Cell Type-Specific Role of Septins in Microtubule Destabilization for the Completion of Cytokinesis
Source: PubMed Central journal article supplement (PMC4133155; doi:10.1371/journal.pgen.1004558), 2014-08-14
Supplement: pgen.1004558.s004.pdf [file pgen.1004558.s004.pdf]

**A**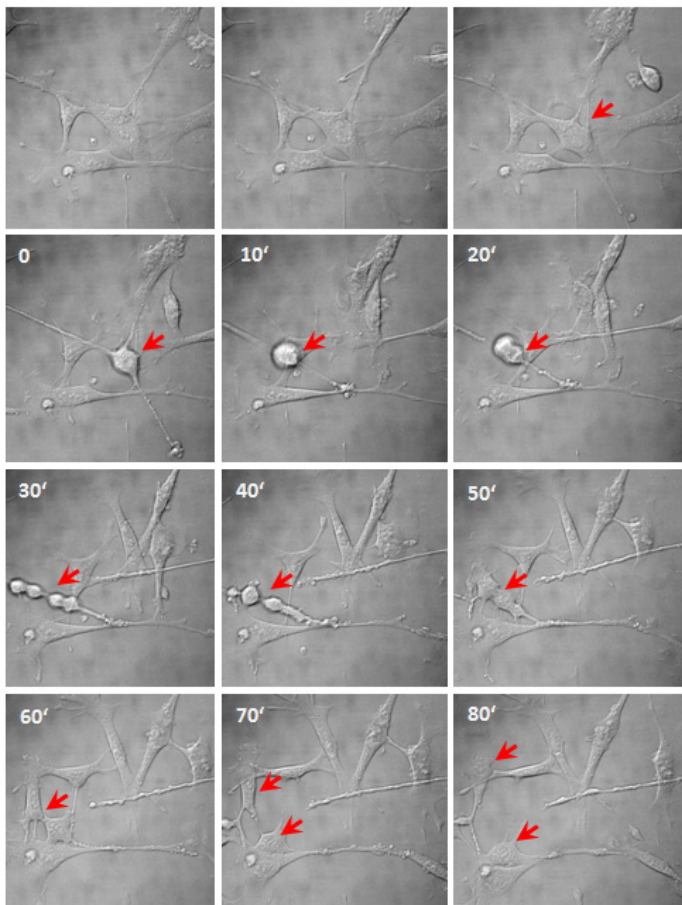**B**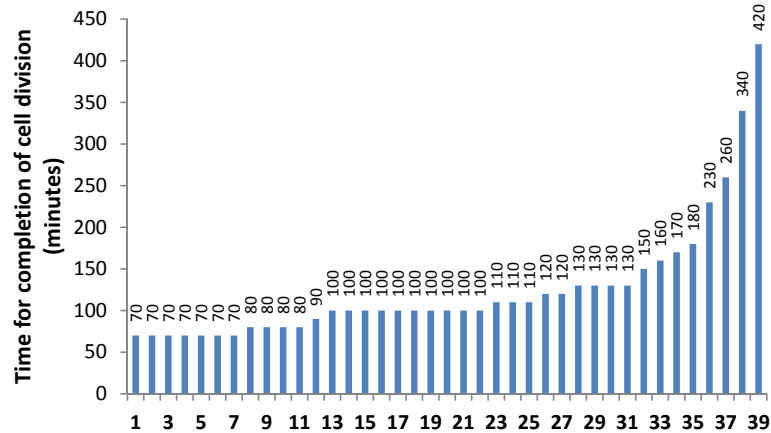**C**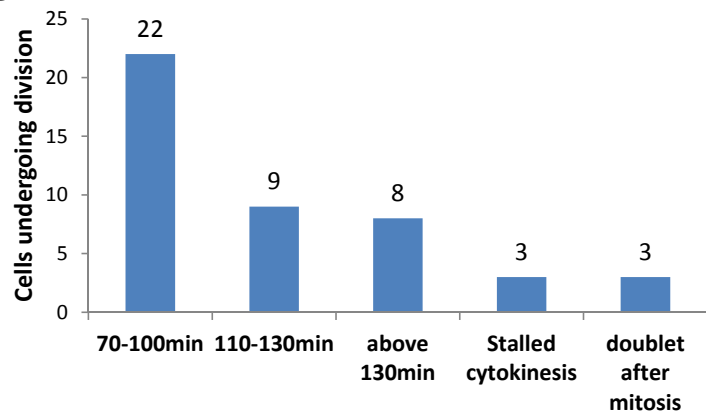**Figure S4**
