# Supplementary material for: Genetic Deletion of SEPT7 Reveals a Cell Type-Specific Role of Septins in Microtubule Destabilization for the Completion of Cytokinesis
Source: PubMed Central journal article supplement (PMC4133155; doi:10.1371/journal.pgen.1004558), 2014-08-14
Supplement: pgen.1004558.s008.pdf [file pgen.1004558.s008.pdf]

|                                  | Leucocytes<br>(x 1000<br>cells/ $\mu$ L) | Erythrocytes<br>(x 1000000<br>cells/ $\mu$ L) | Platelets<br>(x 1000<br>cells/ $\mu$ L) | hemoglobin<br>(g/dL) | Hematocrit<br>(%) |
|----------------------------------|------------------------------------------|-----------------------------------------------|-----------------------------------------|----------------------|-------------------|
| <i>Sept7<sup>wt/wt</sup></i>     | 7,83 +/- 1,12                            | 11,53 +/- 0,55                                | 139,7 +/- 12                            | 16,7 +/- 0,8         | 60,4 +/- 3,07     |
| <i>Sept7<sup>flox/flox</sup></i> | 6,205 +/- 1,49                           | 9,07 +/- 1,03                                 | 337 +/- 73                              | 14,62 +/- 0,98       | 49,6 +/- 4,4      |

|                                  | Lymphocytes<br>(x 1000<br>cells/ $\mu$ L) | Monocytes<br>(cells/ $\mu$ L) | Granulocytes<br>(x 1000<br>cells/ $\mu$ L) | Eosinophils<br>(cells/ $\mu$ L) |
|----------------------------------|-------------------------------------------|-------------------------------|--------------------------------------------|---------------------------------|
| <i>Sept7<sup>wt/wt</sup></i>     | 5,8 +/- 1,47                              | 333 +/- 57                    | 1,73 +/- 0,40                              | 433 +/- 58                      |
| <i>Sept7<sup>flox/flox</sup></i> | 4,05 +/- 0,21                             | 300 +/- 0                     | 1,85 +/- 0,21                              | 600 +/- 141                     |

**Figure S8**
