# Supplementary material for: Genetic Deletion of SEPT7 Reveals a Cell Type-Specific Role of Septins in Microtubule Destabilization for the Completion of Cytokinesis
Source: PubMed Central journal article supplement (PMC4133155; doi:10.1371/journal.pgen.1004558), 2014-08-14
Supplement: pgen.1004558.s012.pdf [file pgen.1004558.s012.pdf]

*Sept7*<sup>flox/flox</sup> MEF + pSERS-Stmn1-IRES-GFP + pRbid-Cre

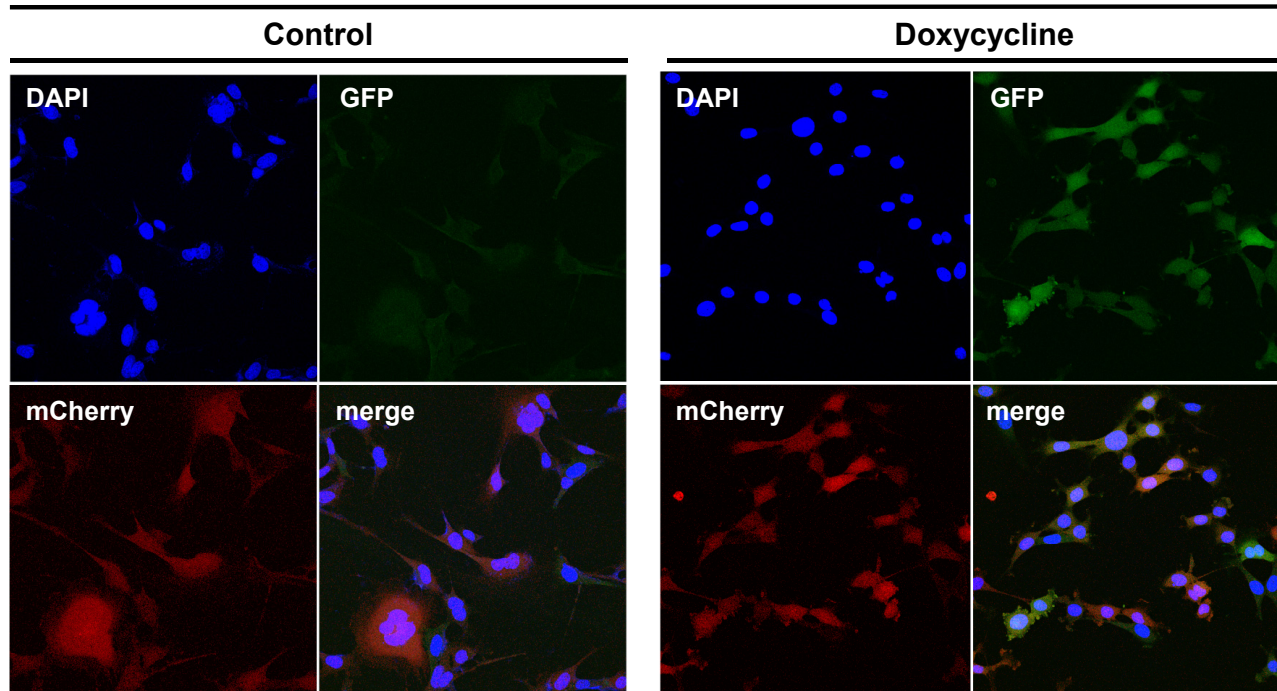

Figure S12
